# Supplementary material
Source: MDPI journal article supplement (https://www.mdpi.com/search?q=molbank-2021-M1270)
Supplement: s002 [file molbank-2021-M1270-s002.mol]

ERB-60.mol
  ChemDraw08062114492D

 58 63  0  0  0  0  0  0  0  0999 V2000
   -3.4316    1.7726    0.0000 C   0  0  0  0  0  0  0  0  0  0  0  0
   -3.7359    1.2142    0.0000 C   0  0  0  0  0  0  0  0  0  0  0  0
   -3.4044    0.6716    0.0000 C   0  0  0  0  0  0  0  0  0  0  0  0
   -2.7687    0.6873    0.0000 C   0  0  0  0  0  0  0  0  0  0  0  0
   -2.4645    1.2457    0.0000 C   0  0  0  0  0  0  0  0  0  0  0  0
   -2.7960    1.7884    0.0000 C   0  0  0  0  0  0  0  0  0  0  0  0
   -2.3317    0.2254    0.0000 N   0  3  0  0  0  0  0  0  0  0  0  0
   -1.7573    0.4984    0.0000 C   0  0  0  0  0  0  0  0  0  0  0  0
   -1.8394    1.1289    0.0000 C   0  0  0  0  0  0  0  0  0  0  0  0
   -1.3776    1.5660    0.0000 C   0  0  0  0  0  0  0  0  0  0  0  0
   -1.2403    0.9158    0.0000 C   0  0  0  0  0  0  0  0  0  0  0  0
   -1.1990    0.1941    0.0000 C   0  0  0  0  0  0  0  0  0  0  0  0
   -2.4484   -0.3996    0.0000 C   0  0  0  0  0  0  0  0  0  0  0  0
   -0.0822   -0.4143    0.0000 C   0  0  0  0  0  0  0  0  0  0  0  0
   -0.0979    0.2214    0.0000 C   0  0  0  0  0  0  0  0  0  0  0  0
   -0.6563    0.5256    0.0000 C   0  0  0  0  0  0  0  0  0  0  0  0
    0.4762   -0.7185    0.0000 N   0  3  0  0  0  0  0  0  0  0  0  0
    1.0189   -0.3870    0.0000 C   0  0  0  0  0  0  0  0  0  0  0  0
    1.0031    0.2486    0.0000 C   0  0  0  0  0  0  0  0  0  0  0  0
    0.4447    0.5529    0.0000 C   0  0  0  0  0  0  0  0  0  0  0  0
    2.1042    0.2759    0.0000 C   0  0  0  0  0  0  0  0  0  0  0  0
    1.5458    0.5801    0.0000 C   0  0  0  0  0  0  0  0  0  0  0  0
    2.6468    0.6074    0.0000 C   0  0  0  0  0  0  0  0  0  0  0  0
    0.4290    1.1885    0.0000 Cl  0  0  0  0  0  0  0  0  0  0  0  0
    3.2339    0.3632    0.0000 N   0  0  0  0  0  0  0  0  0  0  0  0
    3.6476    0.8461    0.0000 C   0  0  0  0  0  0  0  0  0  0  0  0
    3.3161    1.3888    0.0000 C   0  0  0  0  0  0  0  0  0  0  0  0
    2.6976    1.2412    0.0000 C   0  0  0  0  0  0  0  0  0  0  0  0
    4.2833    0.8461    0.0000 C   0  0  0  0  0  0  0  0  0  0  0  0
    4.5875    1.3888    0.0000 C   0  0  0  0  0  0  0  0  0  0  0  0
    4.2560    1.9314    0.0000 C   0  0  0  0  0  0  0  0  0  0  0  0
    3.6204    1.9314    0.0000 C   0  0  0  0  0  0  0  0  0  0  0  0
    2.2147    1.6549    0.0000 C   0  0  0  0  0  0  0  0  0  0  0  0
    2.8470    1.8593    0.0000 C   0  0  0  0  0  0  0  0  0  0  0  0
    3.3815   -0.2553    0.0000 C   0  0  0  0  0  0  0  0  0  0  0  0
   -0.0540   -1.0695    0.0000 C   0  0  0  0  0  0  0  0  0  0  0  0
    0.9739   -1.1143    0.0000 C   0  0  0  0  0  0  0  0  0  0  0  0
   -1.9655   -0.8133    0.0000 C   0  0  0  0  0  0  0  0  0  0  0  0
   -2.0823   -1.4384    0.0000 C   0  0  0  0  0  0  0  0  0  0  0  0
    2.9196   -0.6924    0.0000 C   0  0  0  0  0  0  0  0  0  0  0  0
    3.0672   -1.3109    0.0000 C   0  0  0  0  0  0  0  0  0  0  0  0
    4.5671    2.4860    0.0000 O   0  0  0  0  0  0  0  0  0  0  0  0
    4.1460    3.1950    0.0000 C   0  0  0  0  0  0  0  0  0  0  0  0
   -3.7631    2.3153    0.0000 O   0  0  0  0  0  0  0  0  0  0  0  0
   -4.5875    2.2949    0.0000 C   0  0  0  0  0  0  0  0  0  0  0  0
   -1.5994   -1.8520    0.0000 C   0  0  0  0  0  0  0  0  0  0  0  0
   -1.7503   -2.6602    0.0000 C   0  0  0  0  0  0  0  0  0  0  0  0
   -1.1260   -3.1950    0.0000 C   0  0  0  0  0  0  0  0  0  0  0  0
   -0.3506   -2.9217    0.0000 C   0  0  0  0  0  0  0  0  0  0  0  0
   -0.1996   -2.1135    0.0000 C   0  0  0  0  0  0  0  0  0  0  0  0
   -0.8240   -1.5787    0.0000 C   0  0  0  0  0  0  0  0  0  0  0  0
    2.6053   -1.7480    0.0000 C   0  0  0  0  0  0  0  0  0  0  0  0
    1.8174   -1.5133    0.0000 C   0  0  0  0  0  0  0  0  0  0  0  0
    1.2202   -2.0784    0.0000 C   0  0  0  0  0  0  0  0  0  0  0  0
    1.4110   -2.8781    0.0000 C   0  0  0  0  0  0  0  0  0  0  0  0
    2.1989   -3.1127    0.0000 C   0  0  0  0  0  0  0  0  0  0  0  0
    2.7961   -2.5477    0.0000 C   0  0  0  0  0  0  0  0  0  0  0  0
   -3.2805    0.0844    0.0000 Br  0  5  0  0  0  0  0  0  0  0  0  0
  1  2  2  0      
  2  3  1  0      
  3  4  2  0      
  4  5  1  0      
  5  6  2  0      
  6  1  1  0      
  4  7  1  0      
  7  8  2  0      
  8  9  1  0      
  9  5  1  0      
  9 10  1  0      
  9 11  1  0      
  8 12  1  0      
  7 13  1  0      
 14 15  1  0      
 15 16  1  0      
 16 12  2  0      
 14 17  1  0      
 17 18  1  0      
 18 19  1  0      
 19 20  1  0      
 20 15  2  0      
 21 22  1  0      
 22 19  2  0      
 23 21  2  0      
 20 24  1  0      
 23 25  1  0      
 25 26  1  0      
 26 27  2  0      
 27 28  1  0      
 28 23  1  0      
 26 29  1  0      
 29 30  2  0      
 30 31  1  0      
 31 32  2  0      
 32 27  1  0      
 28 33  1  0      
 28 34  1  0      
 25 35  1  0      
 17 36  1  0      
 37 17  1  0      
 13 38  1  0      
 38 39  1  0      
 35 40  1  0      
 40 41  1  0      
 42 43  1  0      
 31 42  1  0      
 44 45  1  0      
  1 44  1  0      
 50 51  2  0      
 49 50  1  0      
 48 49  2  0      
 47 48  1  0      
 46 47  2  0      
 46 51  1  0      
 39 46  1  0      
 56 57  2  0      
 55 56  1  0      
 54 55  2  0      
 53 54  1  0      
 52 53  2  0      
 52 57  1  0      
 41 52  1  0      
M  CHG  3   7   1  17   1  58  -1
M  STY  1   1 SUP
M  SLB  1   1   1
M  SAL   1  2  42  43
M  SBL   1  1  47
M  SMT   1 OMe
M  SBV   1 47  -10.6931    9.4779
M  STY  1   2 SUP
M  SLB  1   2   2
M  SAL   2  2  44  45
M  SBL   2  1  49
M  SMT   2 OMe
M  SBV   2 49  -11.3357    9.4659
M  STY  1   3 SUP
M  SLB  1   3   3
M  SAL   3  6  46  47  48  49  50  51
M  SBL   3  1  56
M  SMT   3 Ph
M  SBV   3 56  -10.5213    8.5096
M  STY  1   4 SUP
M  SLB  1   4   4
M  SAL   4  6  52  53  54  55  56  57
M  SBL   4  1  63
M  SMT   4 Ph
M  SBV   4 63  -11.4661    8.4862
M  END
